# Supplementary material
Source: publisher figshare collection journal article supplement (https://acs.figshare.com/ndownloader/files/5798496)

#### Terms & Conditions

Electronic Supporting Information files are available without a subscription to ACS Web Editions. The American Chemical Society holds a copyright ownership interest in any copyrightable Supporting Information. Files available from the ACS website may be downloaded for personal use only. Users are not otherwise permitted to reproduce, republish, redistribute, or sell any Supporting Information from the ACS website, either in whole or in part, in either machine-readable form or any other form without permission from the American Chemical Society. For permission to reproduce, republish and redistribute this material, requesters must process their own requests via the RightsLink permission system. Information about how to use the RightsLink permission system can be found at <http://pubs.acs.org/page/copyright/permissions.html>

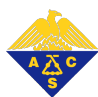

ACS Publications

MOST TRUSTED. MOST CITED. MOST READ.

Copyright © 1998 American Chemical Society

$^{19}\text{F}$  NMR (ref  $\text{CFCl}_3$  as 0)

Reaction mixture, as obtained, after the coupled oxidation of porphyrin 3,  
followed by hydrolysis and esterification.

No other signals appear in the spectrum (from 100 to -100 ppm)

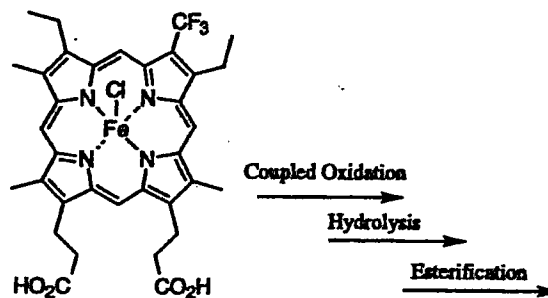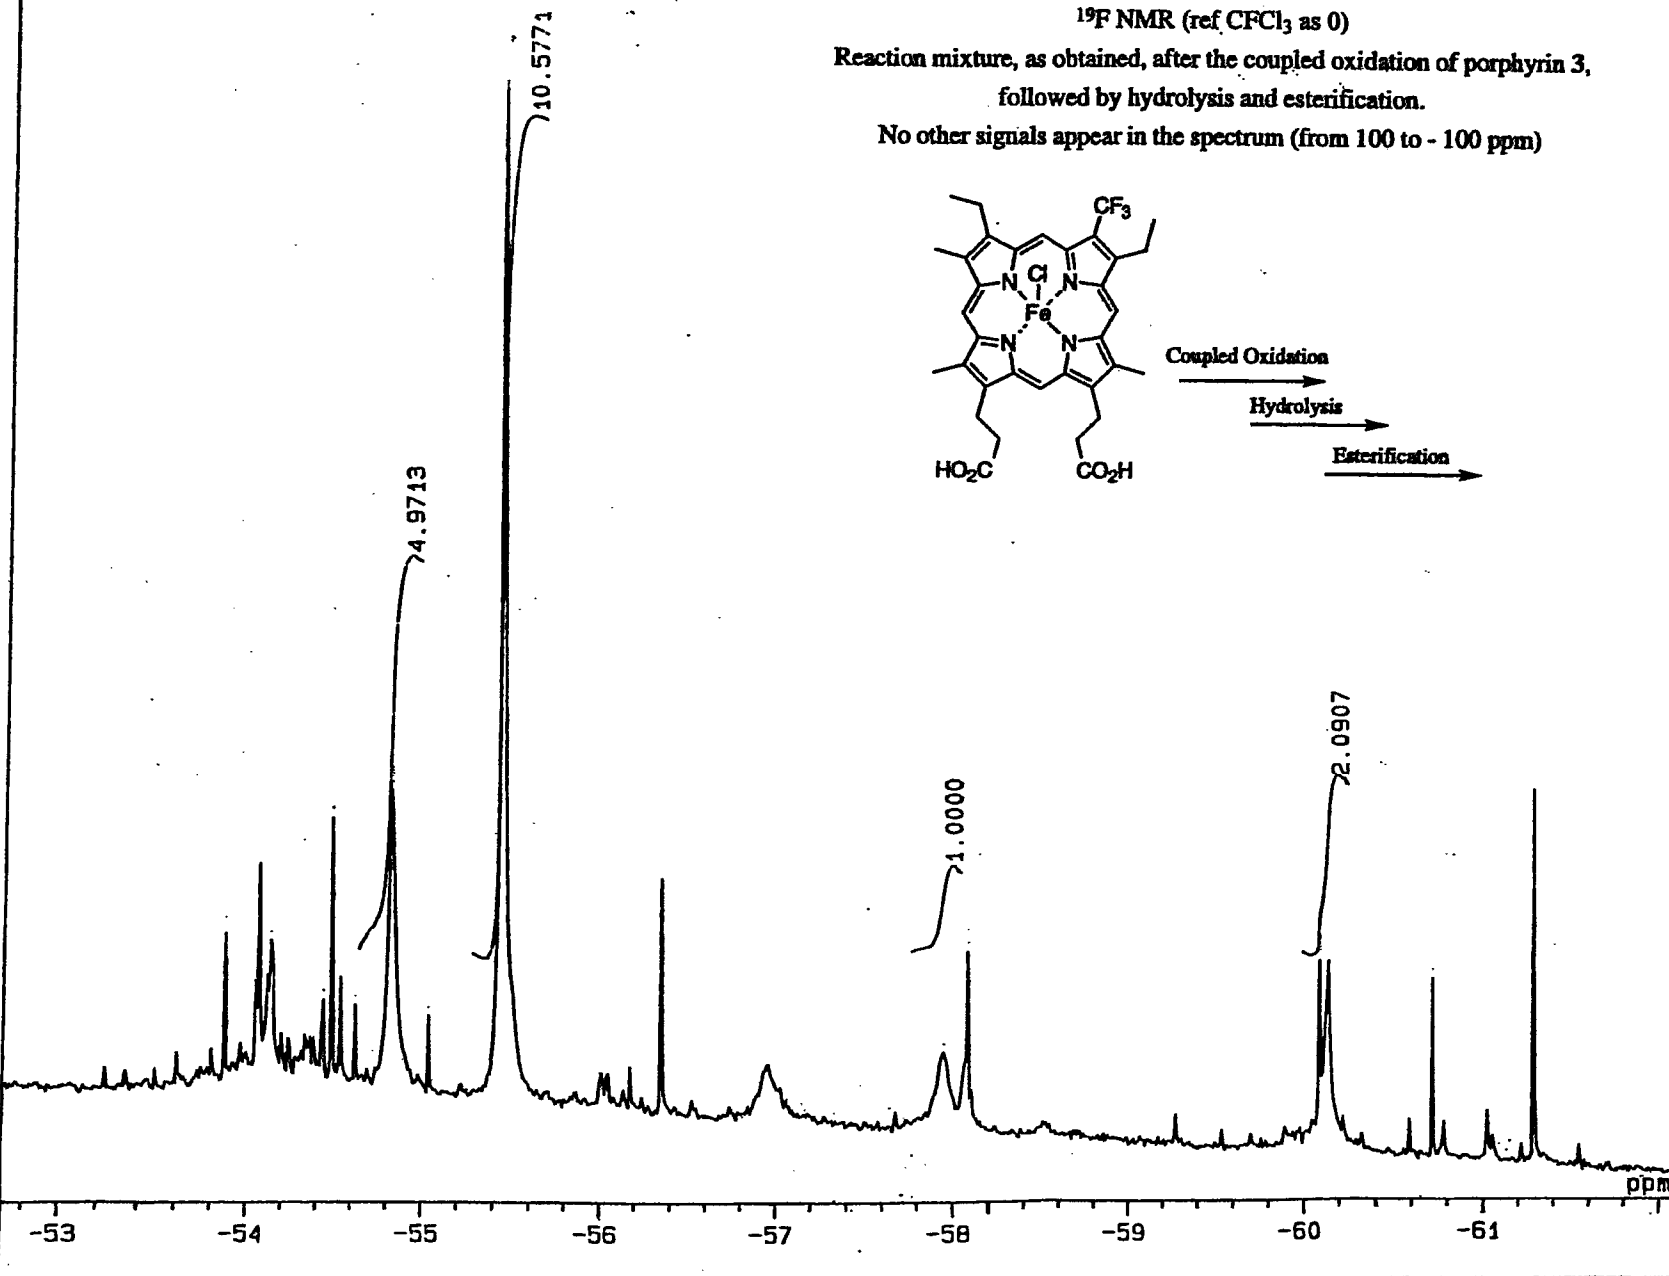

-54.888

-55.477

$^{19}\text{F}$  NMR (ref  $\text{CFCl}_3$  as 0)

Reaction mixture after the coupled oxidation of porphyrin 3,  
followed by hydrolysis and esterification, after column chromatography  
(silica,  $\text{CHCl}_3$ : acetone, 4:1)

No other signals appear in the spectrum (from 100 to -100 ppm)

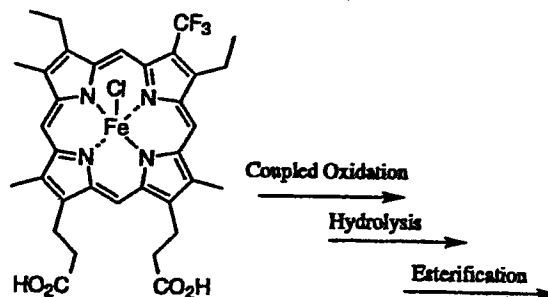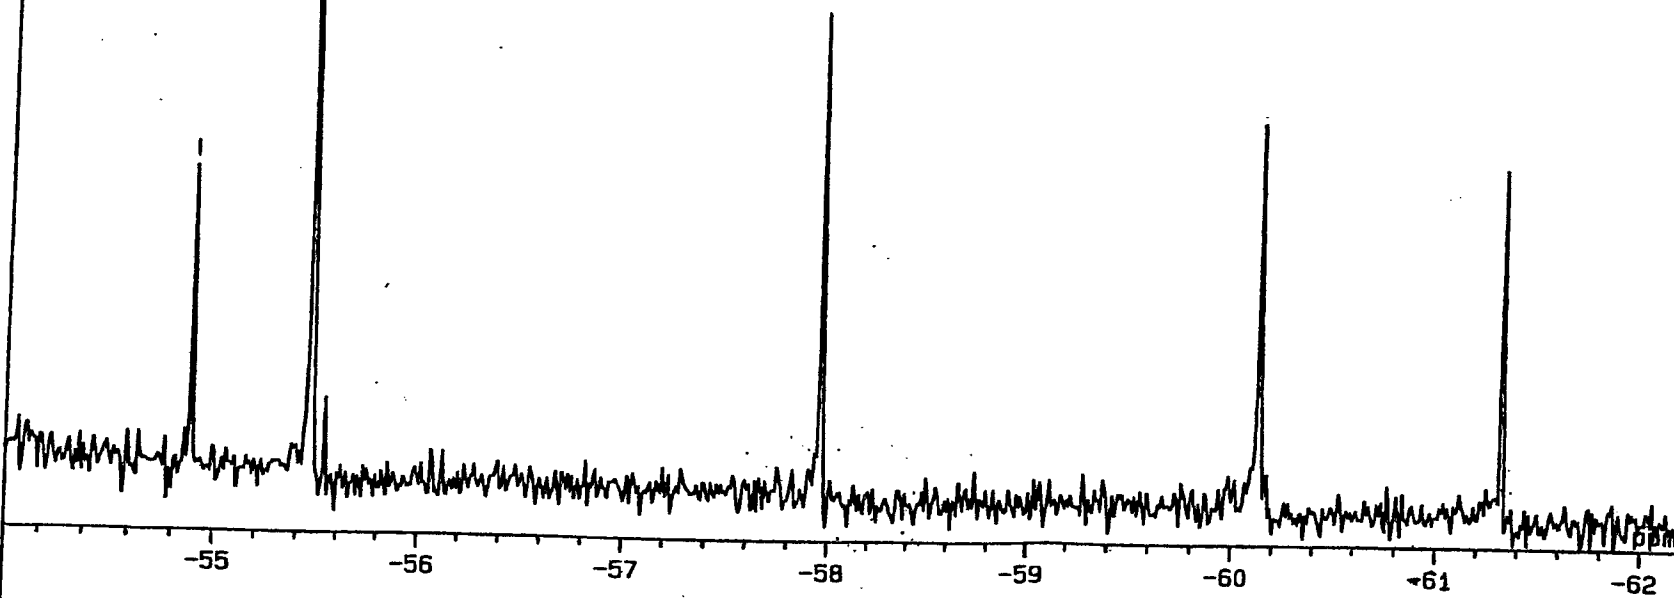

-60.14

1.

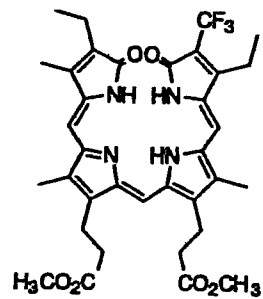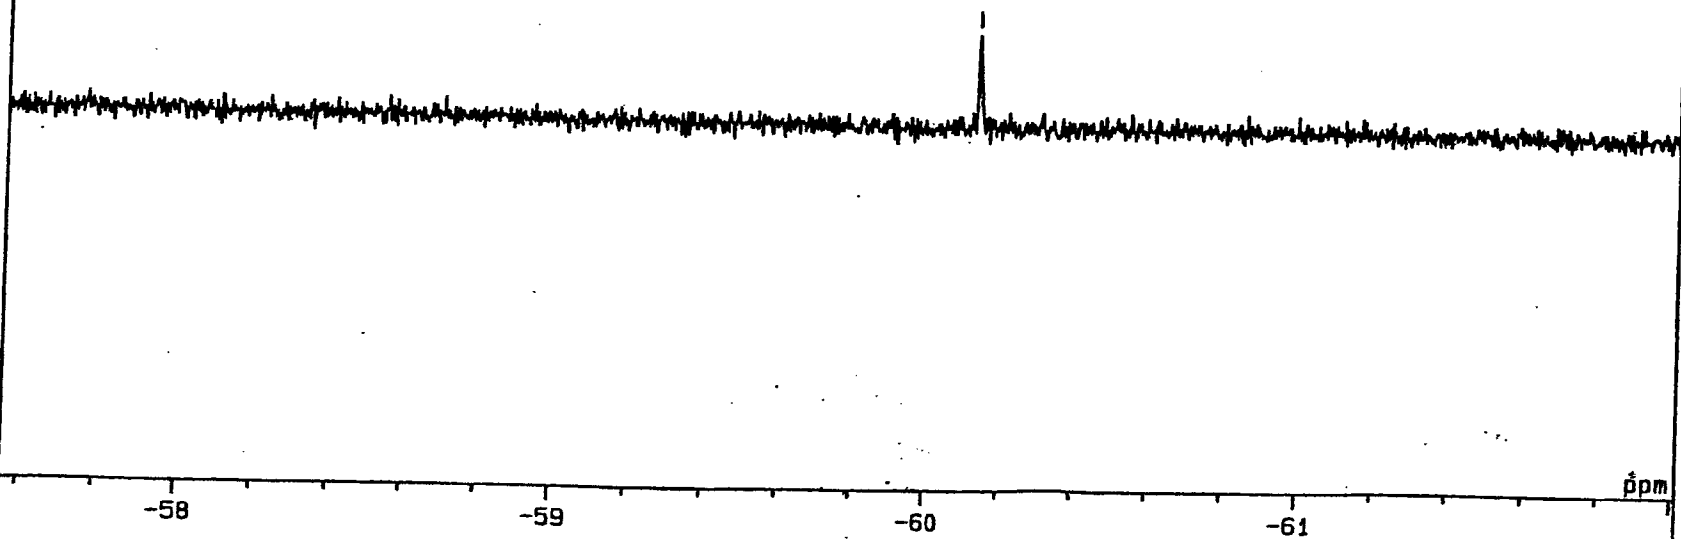

$^{19}\text{F}$  NMR (ref  $\text{CFCl}_3$  as 0)

Compound 5 (purified by HPLC)

No other signals appear in the spectrum (from 100 to -100 ppm)

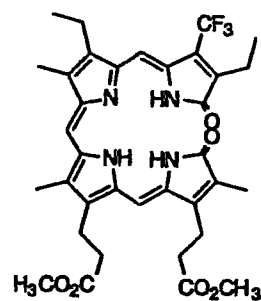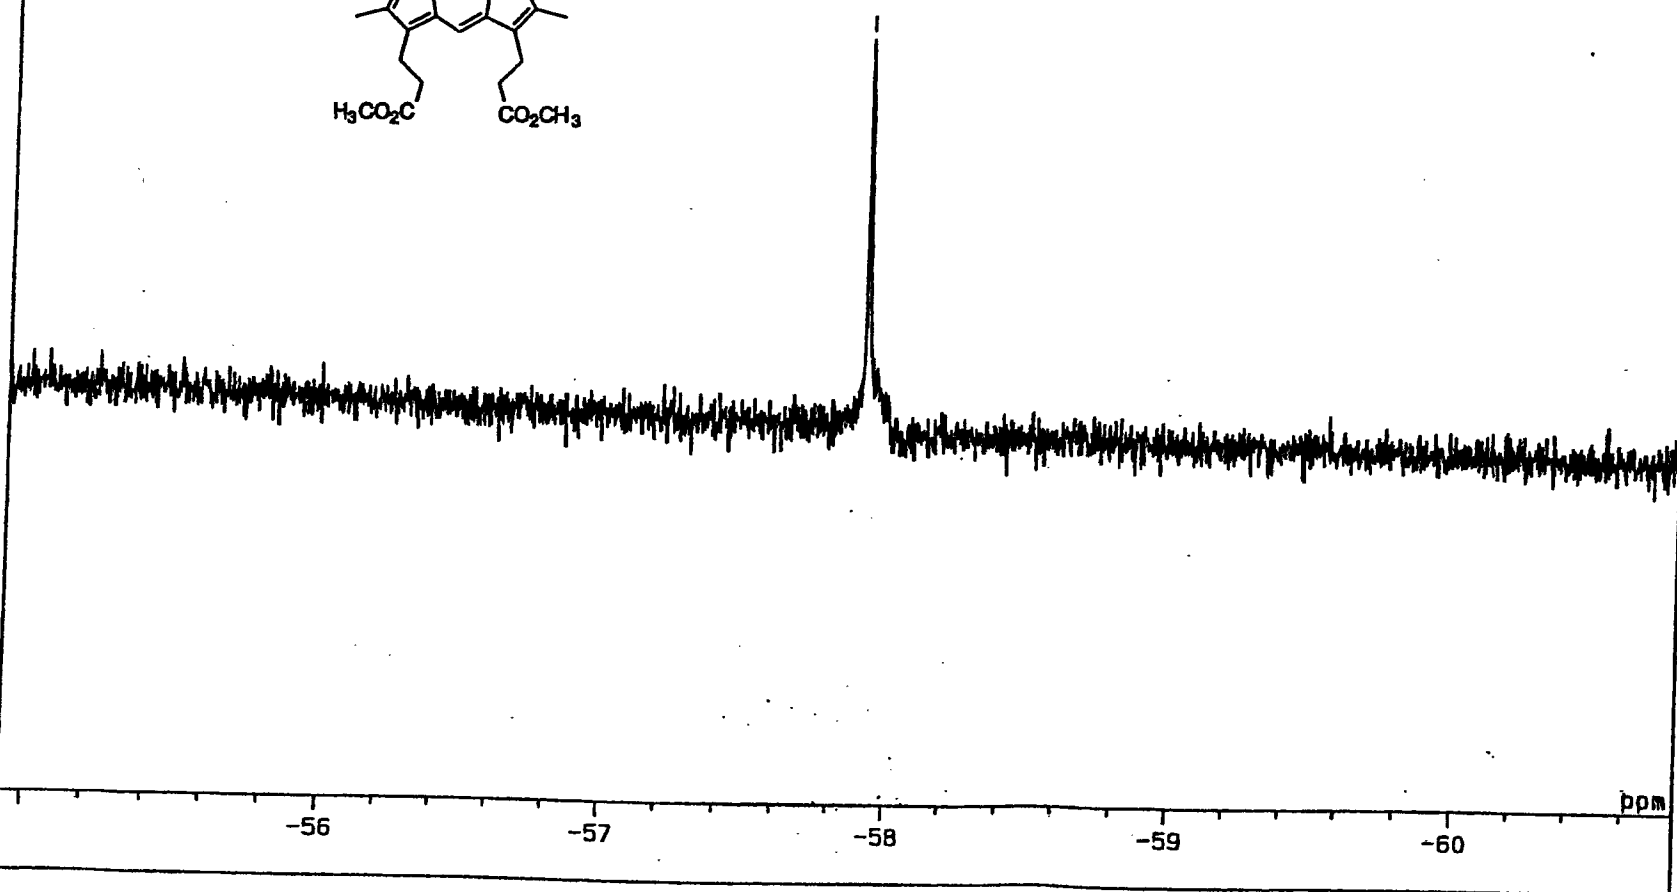

$^{19}\text{F}$  NMR (ref  $\text{CFCl}_3$  as 0)

Compound 6 (purified by HPLC)

No other signals appear in the spectrum (from 100 to -100 ppm)

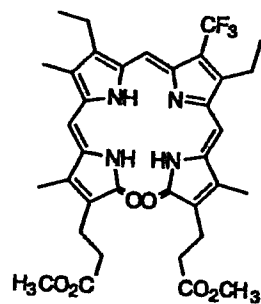

-54.896

ppm

-53

-54

-55

-56

Compound 7 (purified by HPLC)

No other signals appear in the spectrum (from 100 to -100 ppm)

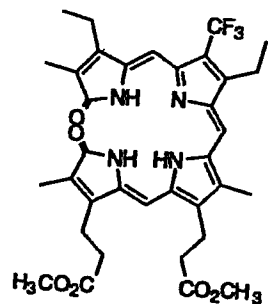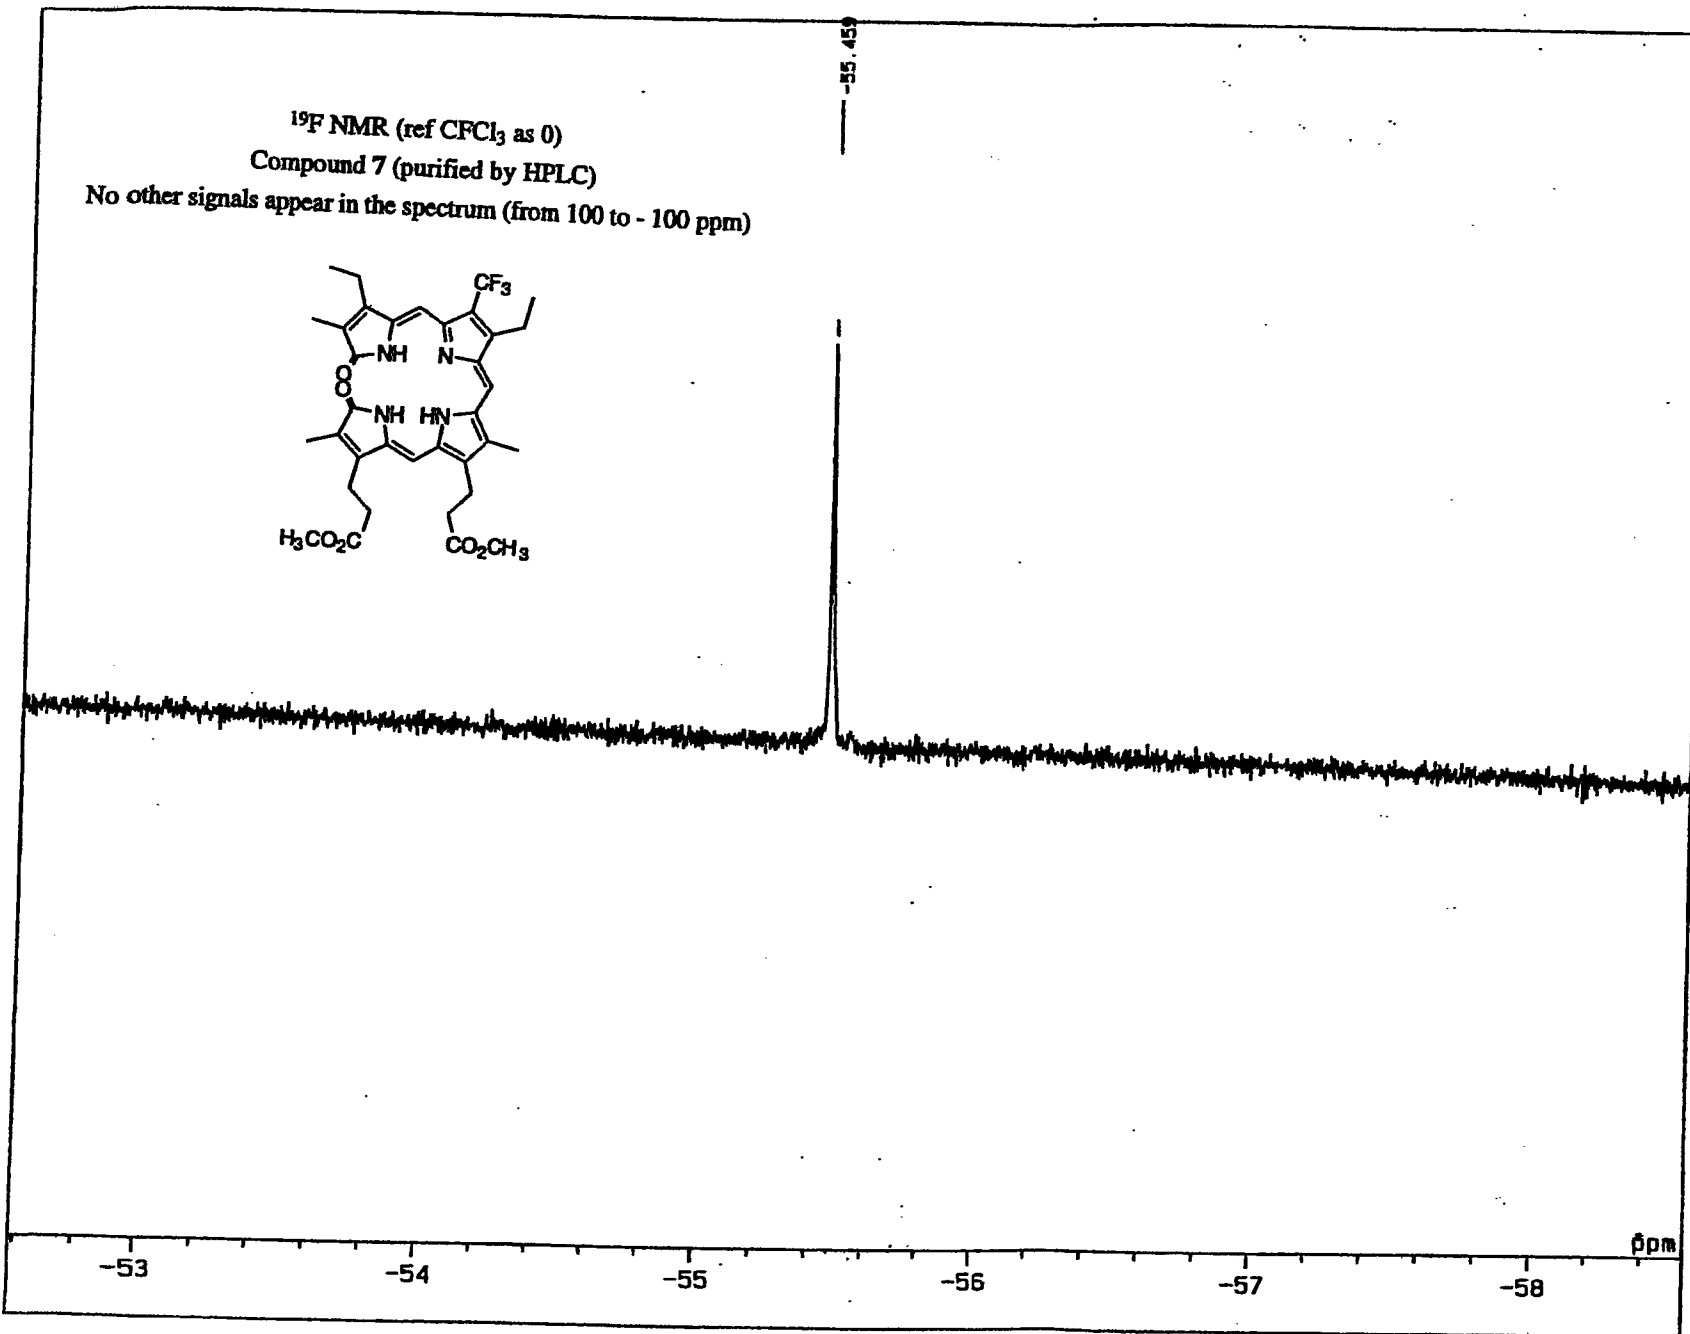

alpha

$^1\text{H}$  NMR (ref TMS as 0) in  $\text{CDCl}_3$

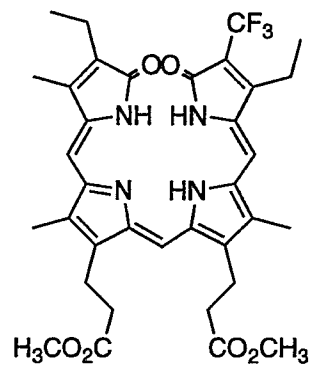

4

$\alpha$  isomer

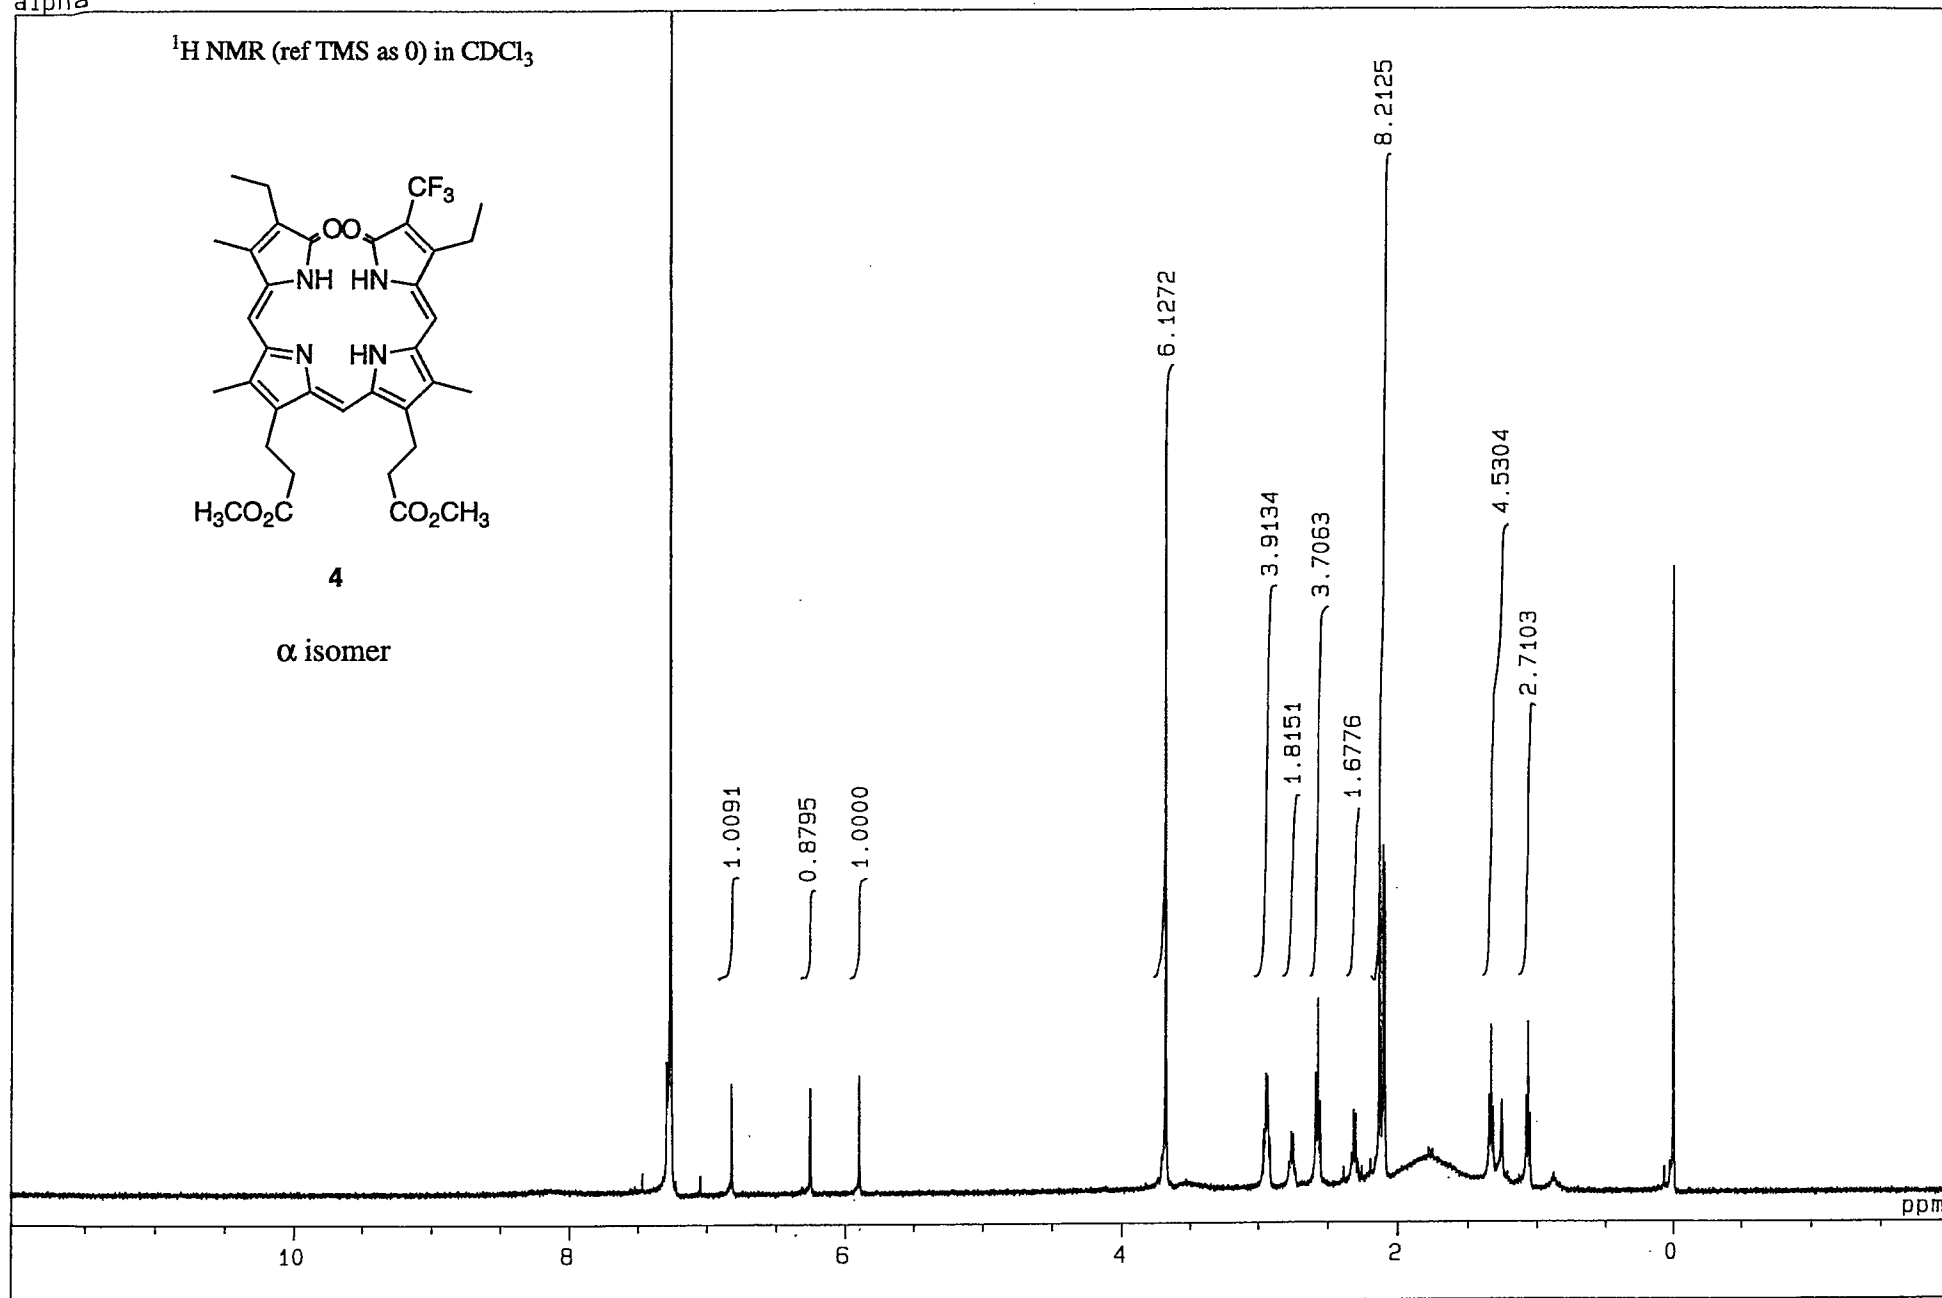



beta

$^1\text{H}$  NMR (ref TMS as 0) in  $\text{CDCl}_3$

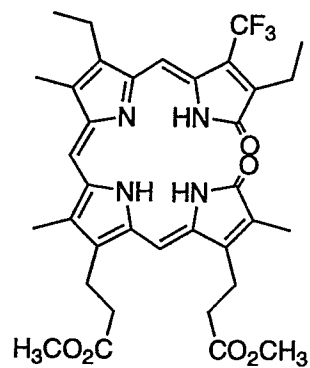

5

$\beta$  isomer

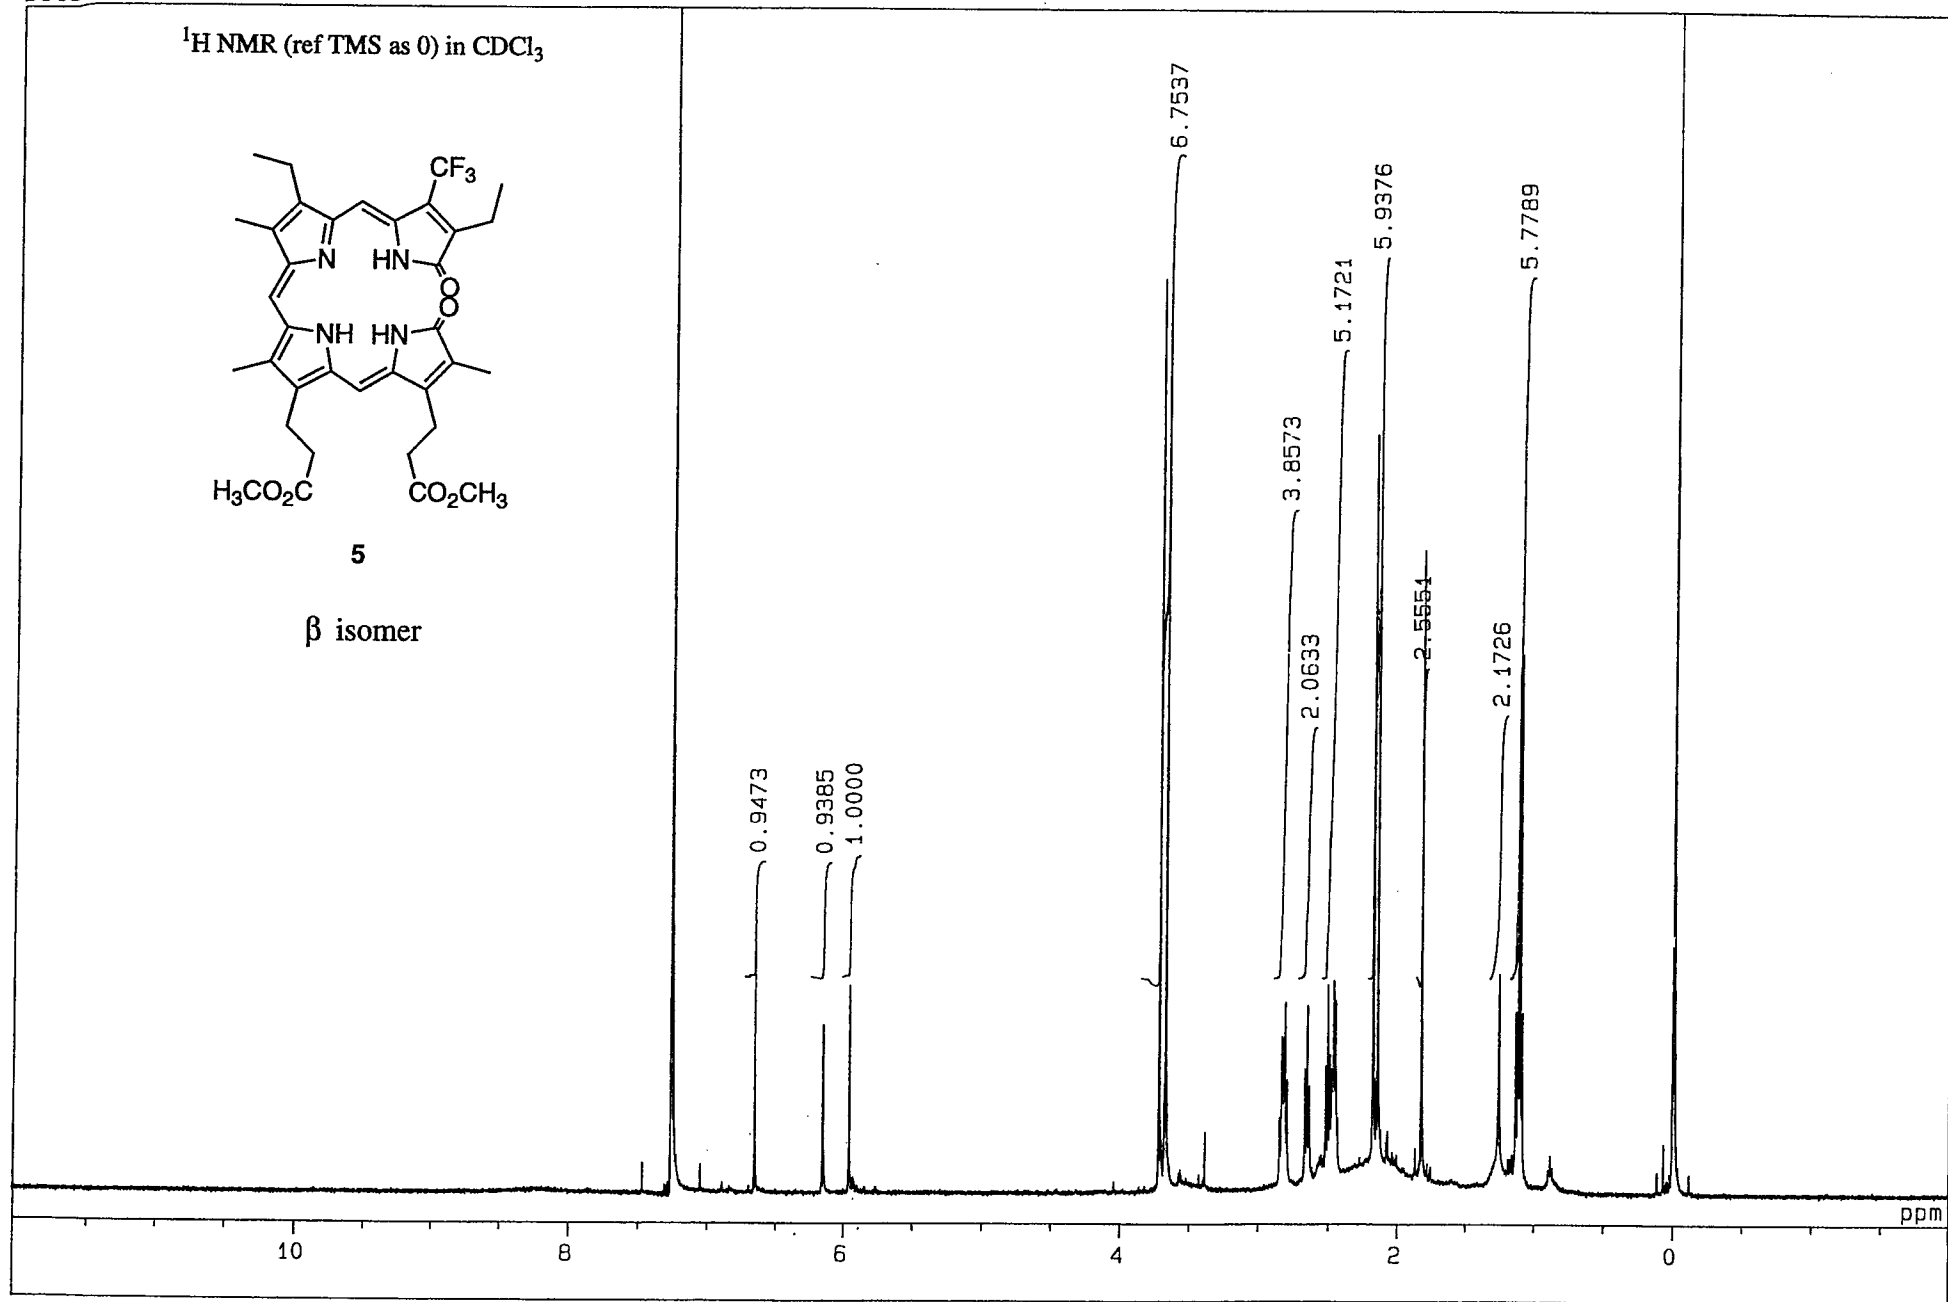

gamma

$^1\text{H}$  NMR (ref TMS as 0) in  $\text{CDCl}_3$

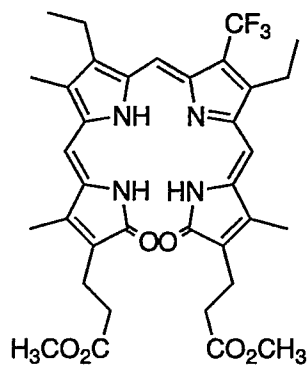

6

$\gamma$  isomer

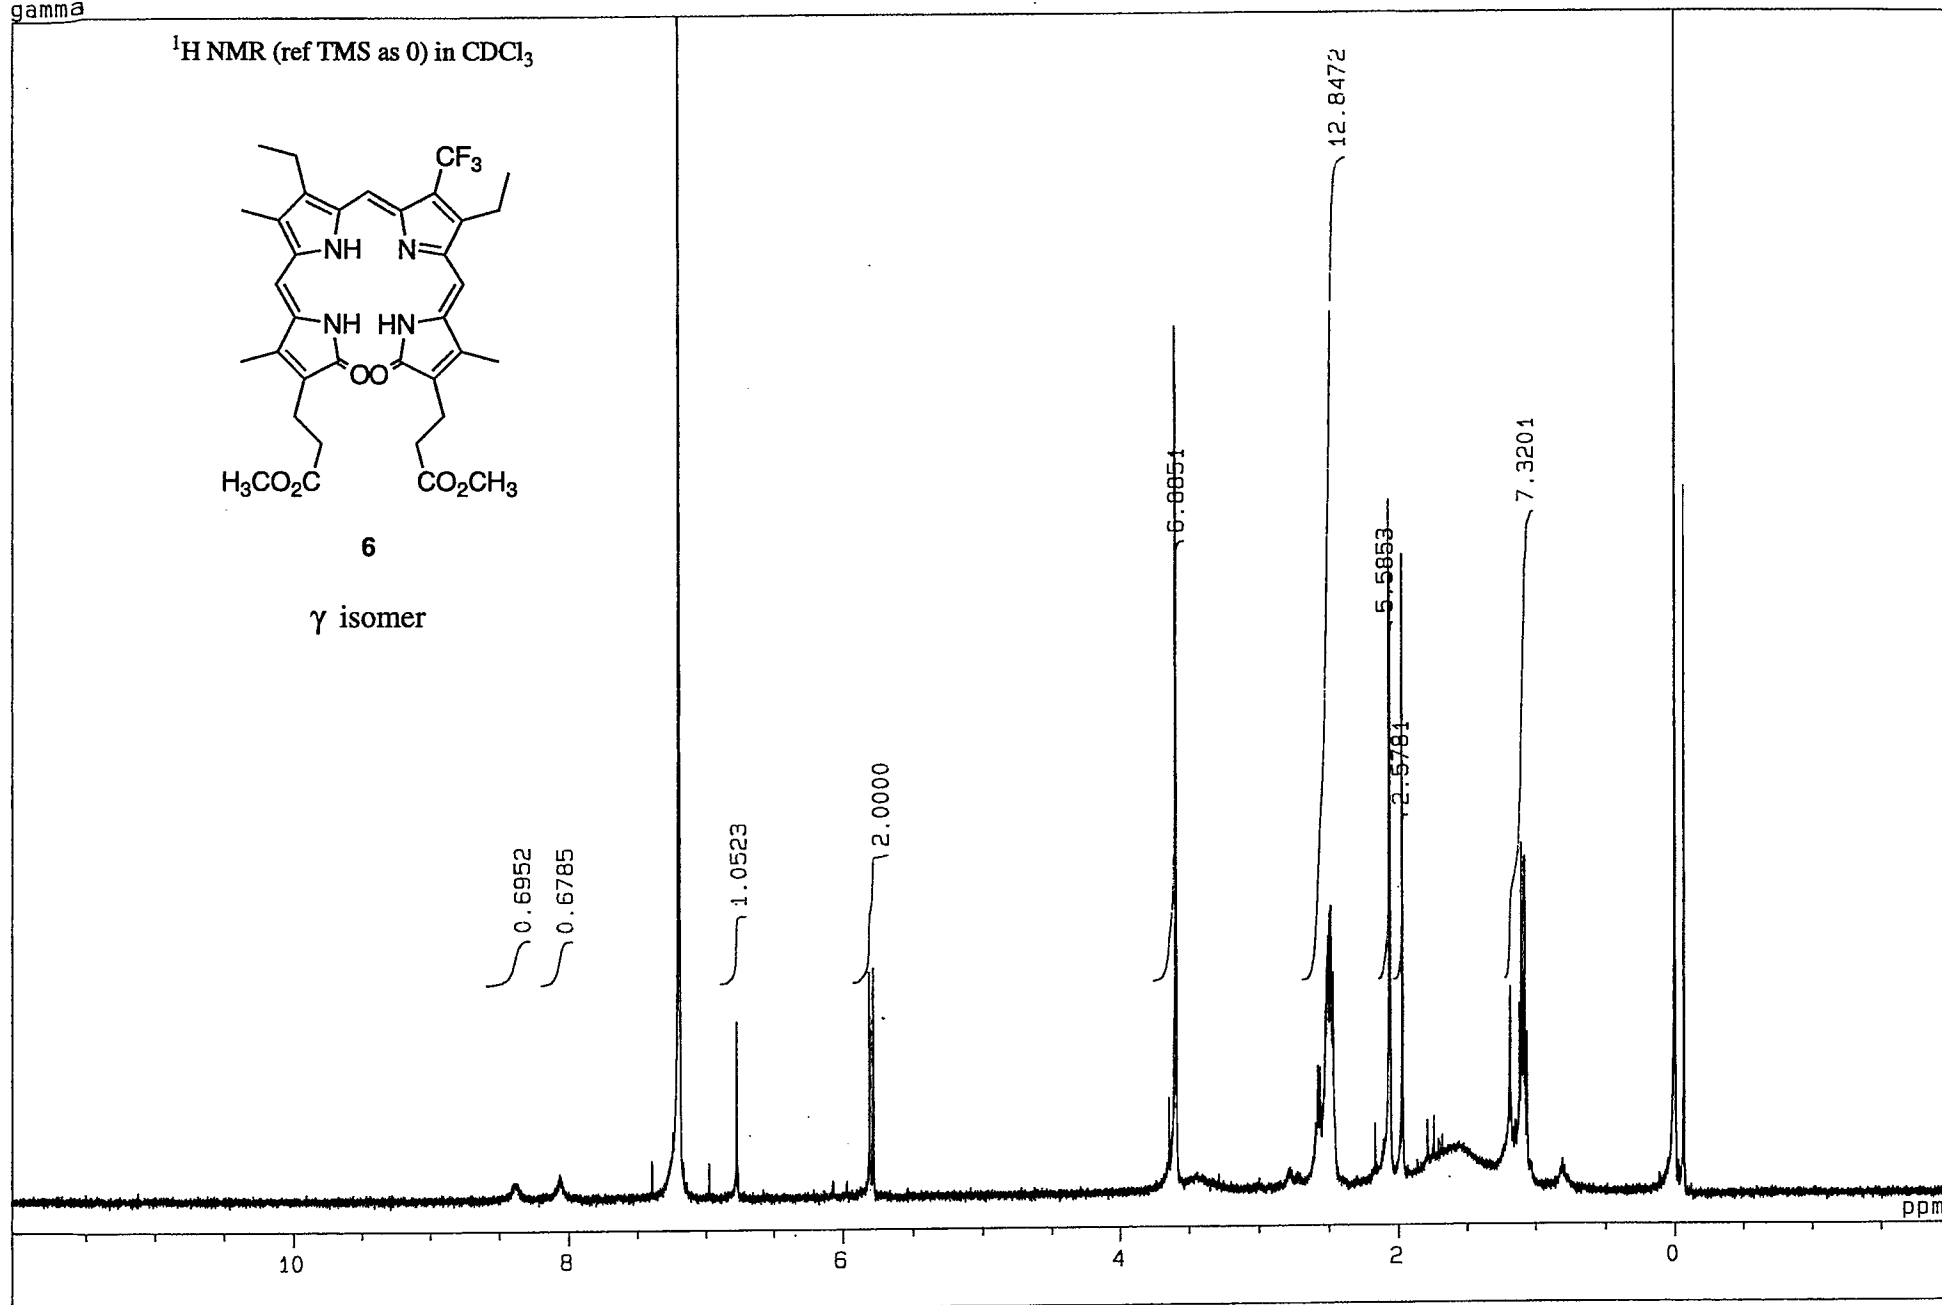

delta

$^1\text{H}$  NMR (ref TMS as 0) in  $\text{CDCl}_3$

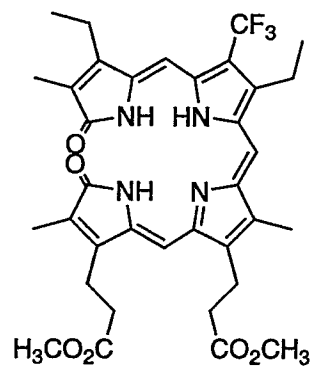

7

$\delta$  isomer

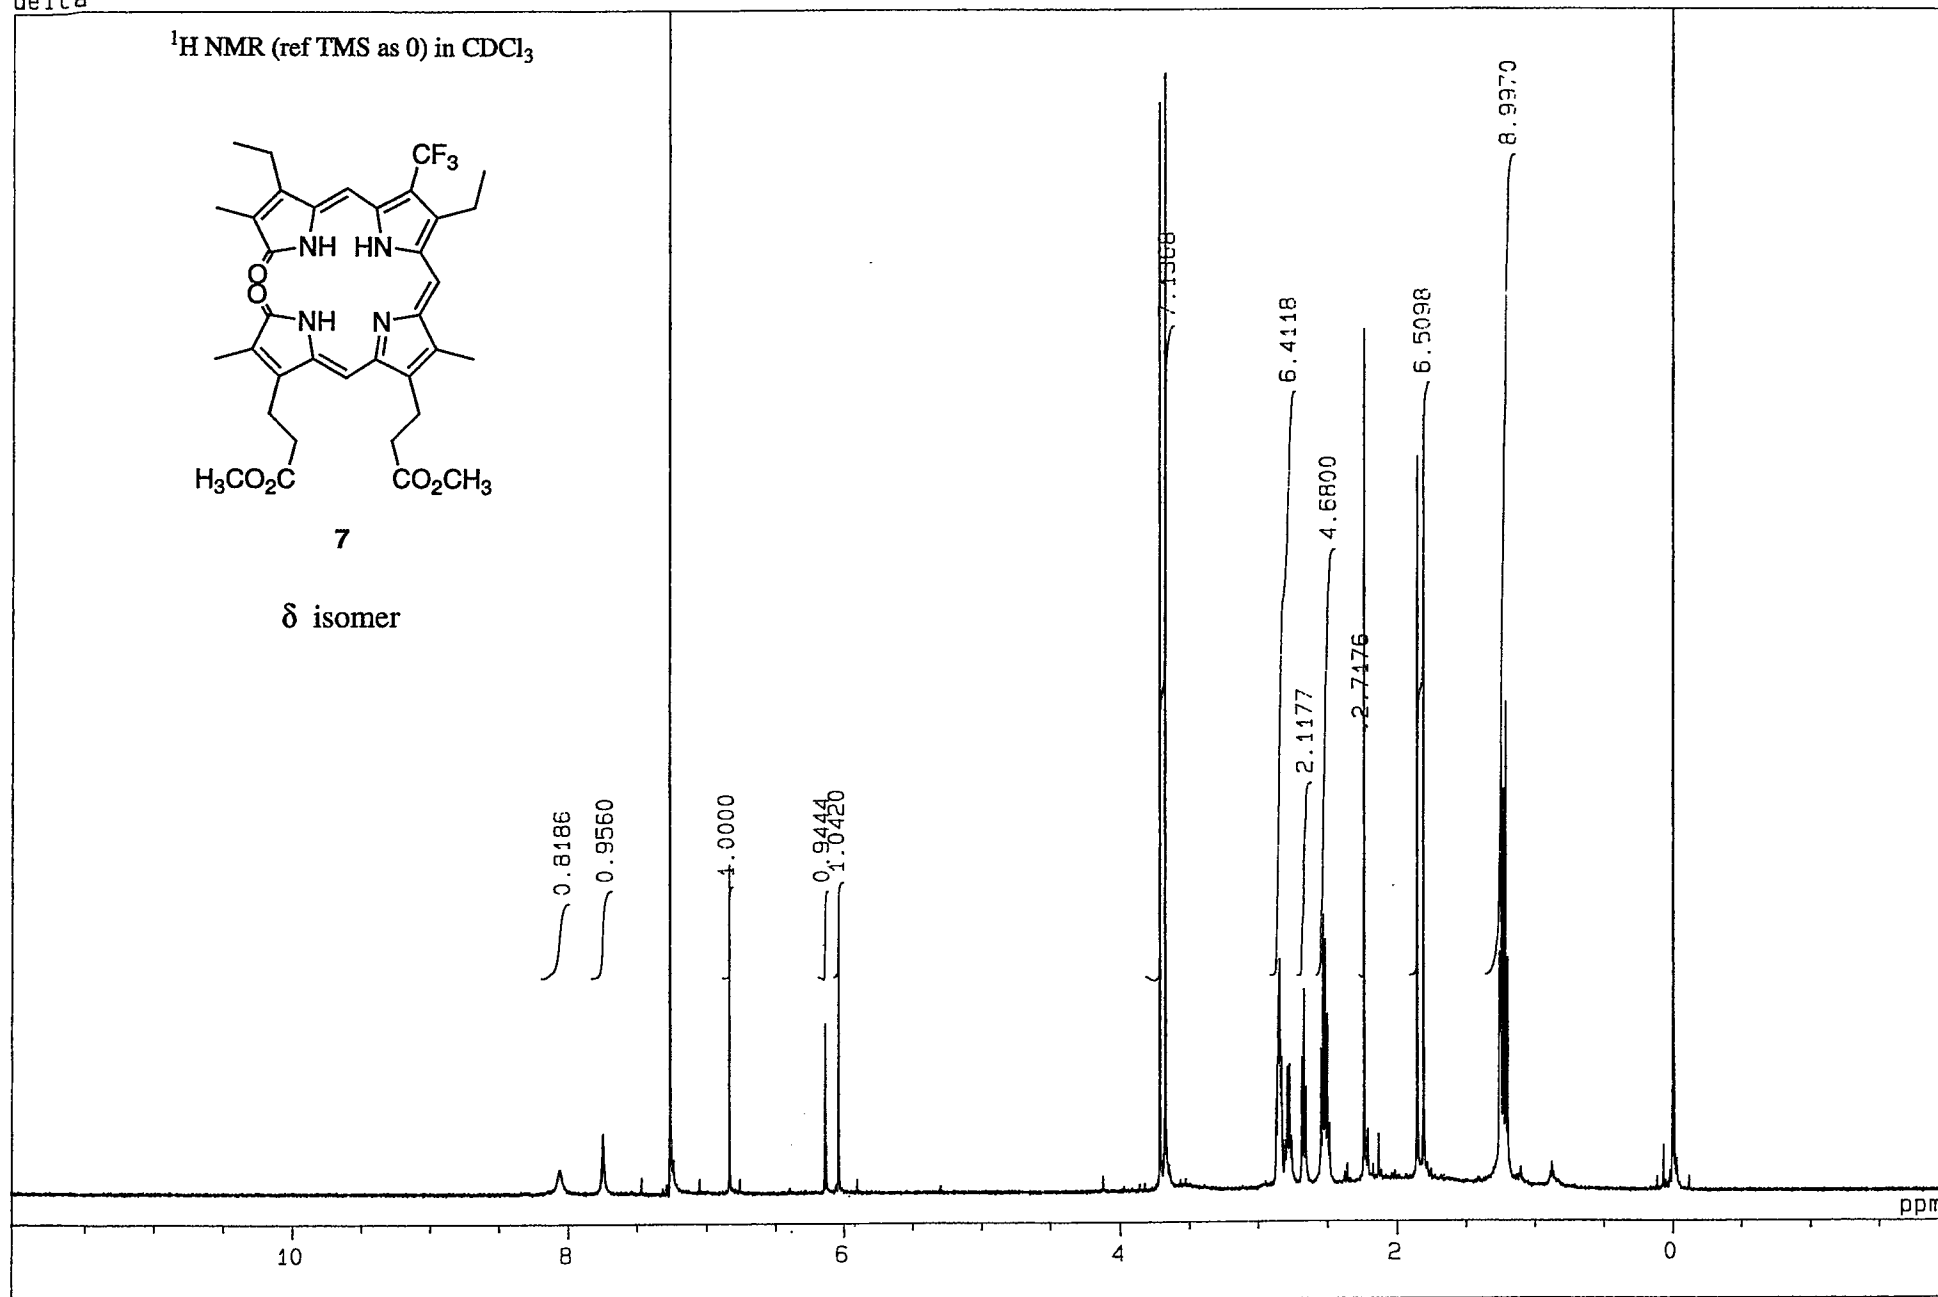

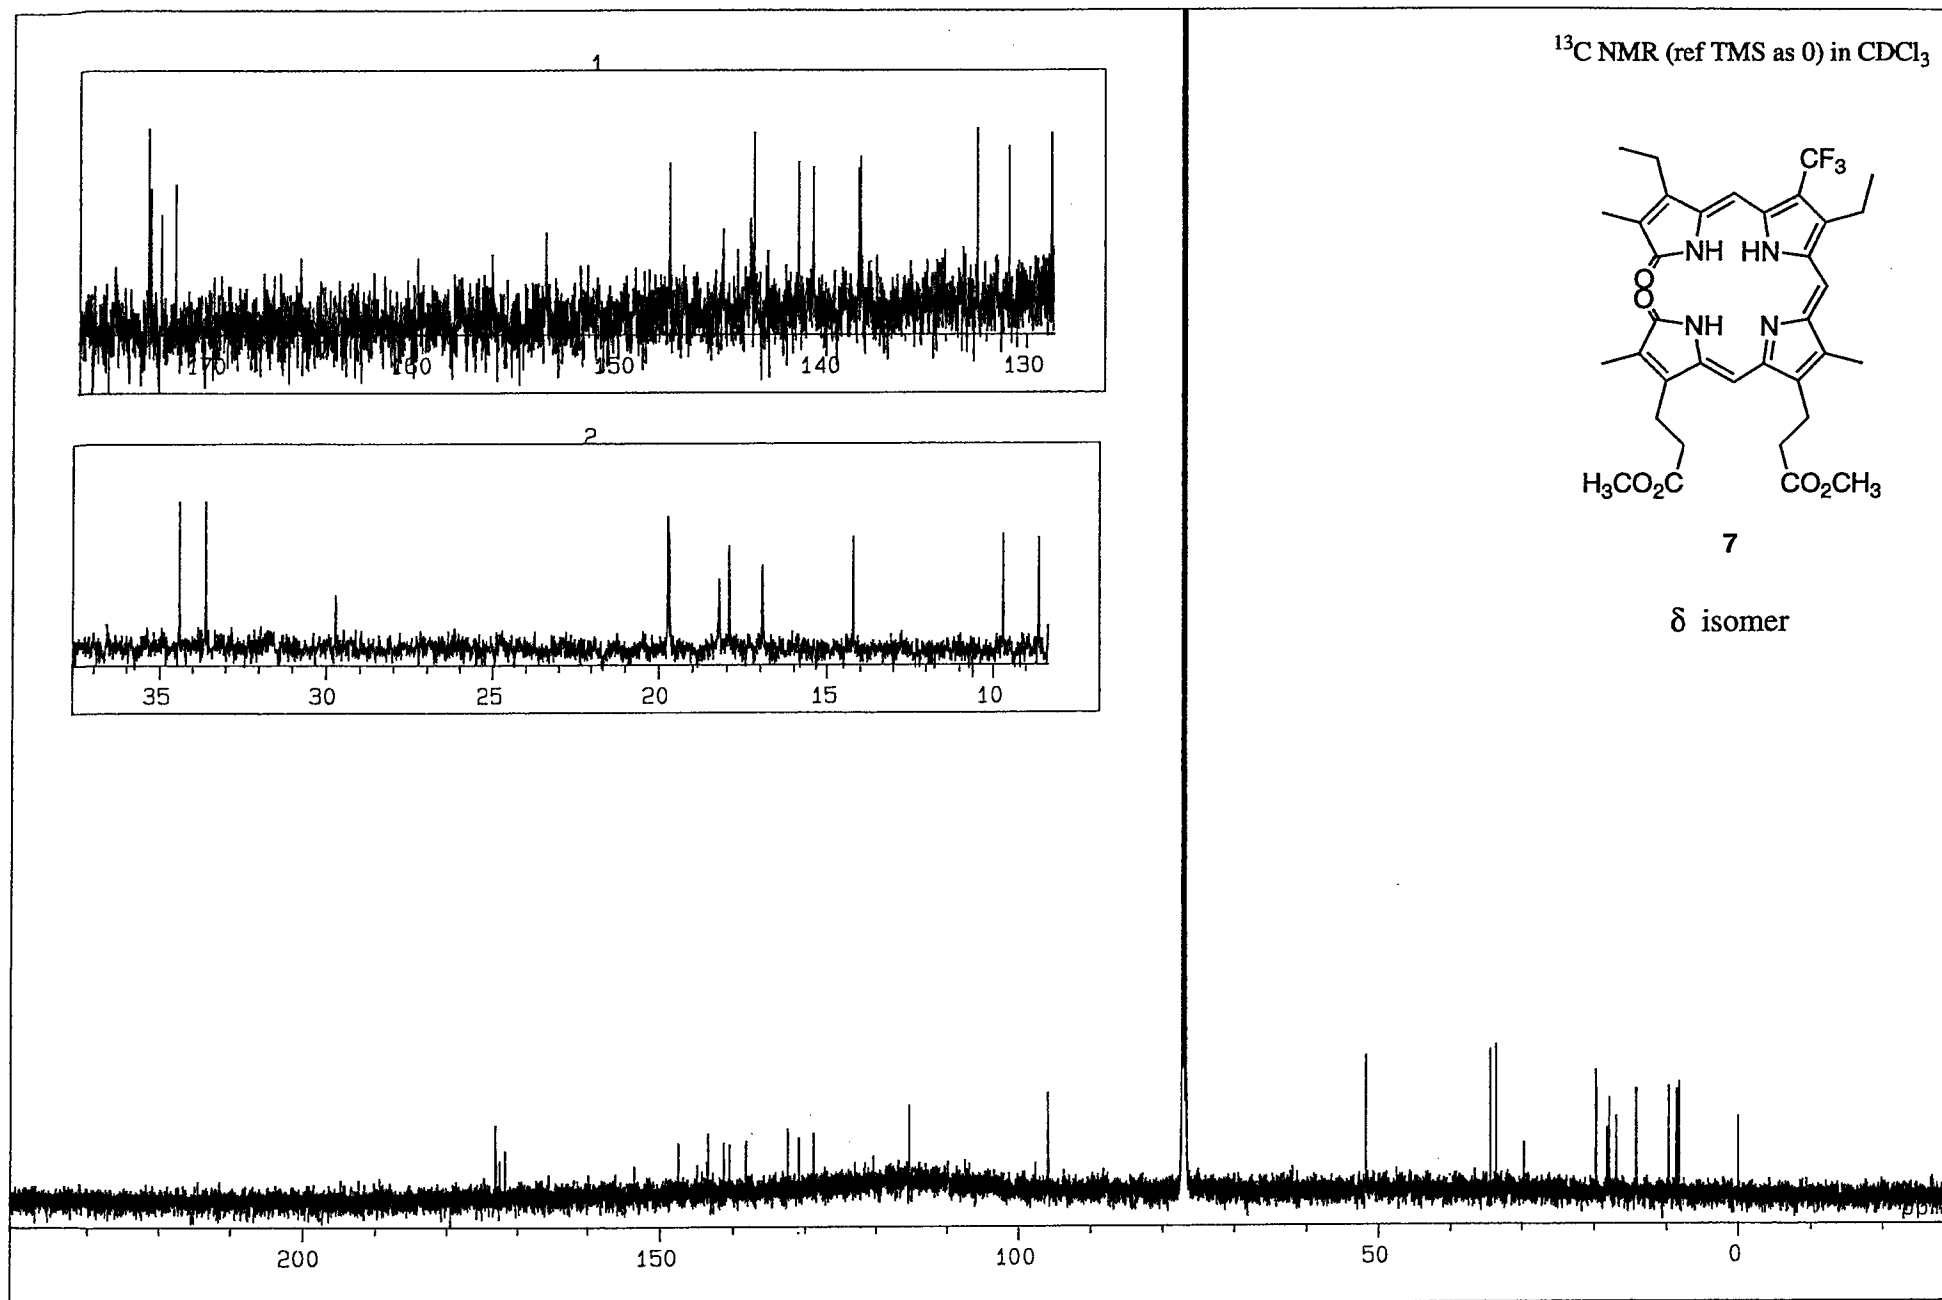

Supplement: Supplementary file 1 [file 5798496]
